# Supplementary material for: High glucose induced c-Met activation promotes aggressive phenotype and regulates expression of glucose metabolism genes in HCC cells
Source: PubMed Central journal article supplement (PMC8166976; doi:10.1038/s41598-021-89765-5), 2021-05-31

## Supplementary File 1

High glucose induced c-Met activation promotes aggressive phenotype and regulates expression of glucose metabolism genes in HCC cells

Hande Topel<sup>1,2</sup>, Ezgi Bağırsakçı<sup>1,3</sup>, Yeliz Yılmaz<sup>1,2</sup>, Aysim Güneş<sup>1</sup>, Gülsün Bağcı<sup>1,3</sup>, Dehan Çömez<sup>1,3</sup>, Erkan Kahraman<sup>1,2</sup>, Peyda Korhan<sup>1</sup>, Neşe Atabey<sup>1,\*</sup>

### Affiliations

<sup>1</sup> Izmir Biomedicine and Genome Center (IBG), Balçova, 35340, Izmir, Turkey

<sup>2</sup> Department of Medical Biology and Genetics, Graduate School of Health Sciences, Dokuz Eylül University, 35340, Balçova, Izmir, Turkey

<sup>3</sup> Department of Molecular Biology and Genetics, Izmir International Biomedicine and Genome Institute, Dokuz Eylül University, 35340, Balçova, Izmir, Turkey

\* Corresponding author: [nese.atabey@ibg.edu.tr](mailto:nese.atabey@ibg.edu.tr), Tel.: +90-232 299 4172

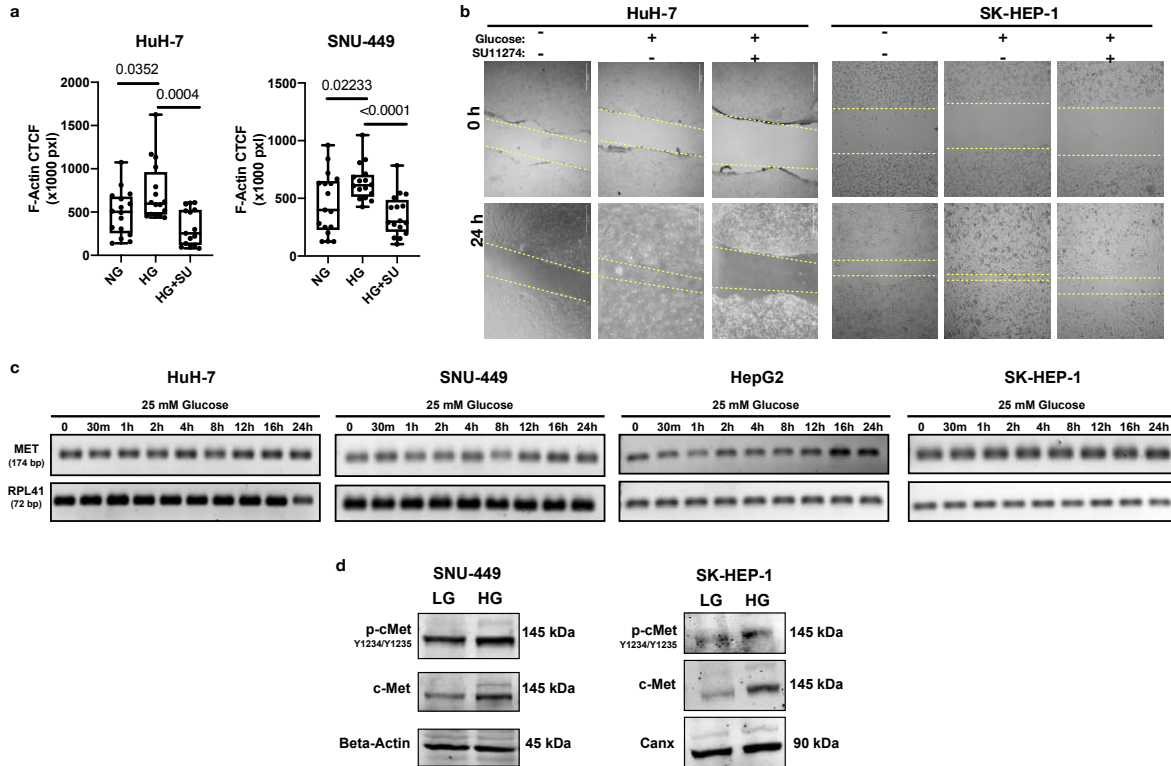

**Supplementary Figure 1.** Graphical presentation of (a) fluorescent intensity measurements for Phalloidin staining. Microscopic image of (b) wound closure of HuH-7 and SK-HEP-1 cells after 24-hours incubation in no-, high-glucose and c-Met inhibitor supplemented culture conditions. (c) RT-PCR agarose gel electrophoresis image of time-dependent MET and RPL41 expressions in response to high glucose (25 mM) treatment of HuH-7, SNU-449, HepG2 and SK-HEP-1 cells. (d) Immunoblotting of c-Met activity phosphorylations (Y1234/Y1235) and c-Met protein in low-glucose (5.5 mM) and high-glucose (25 mM) supplemented conditions of SNU-449 and SK-HEP-1 cells. Boxplot graphs were generated and statistical analyses were performed with the GraphPad Prism version 8.2.1 for MacOS, GraphPad Software, San Diego, California USA, [www.graphpad.com](http://www.graphpad.com). \*  $p \leq 0.05$ , \*\*  $p \leq 0.01$ , \*\*\*  $p \leq 0.001$ , \*\*\*\*  $p \leq 0.0001$

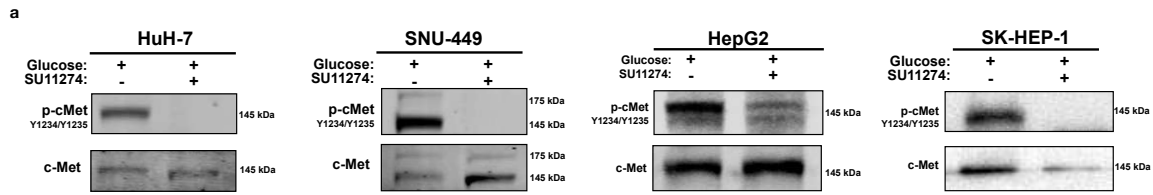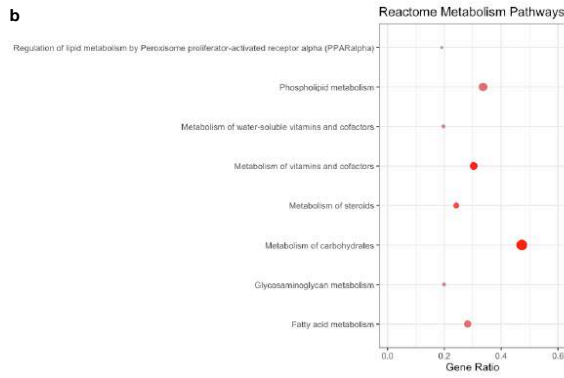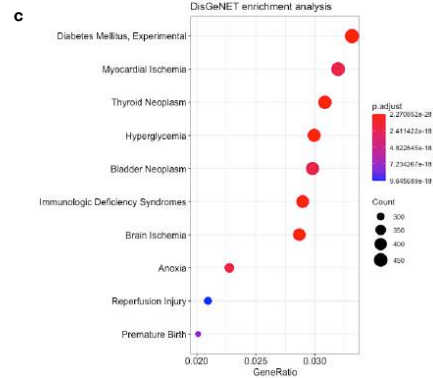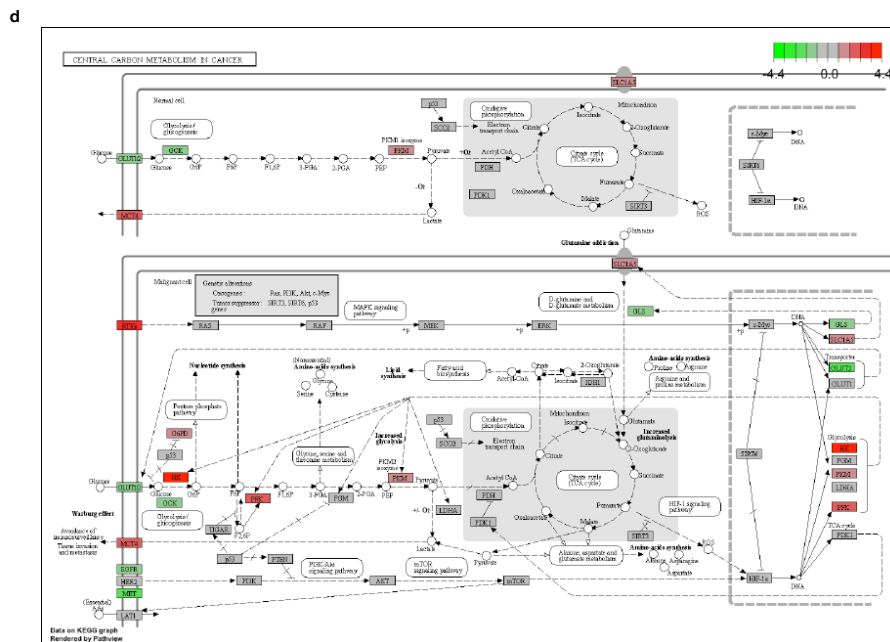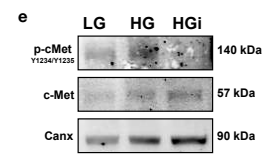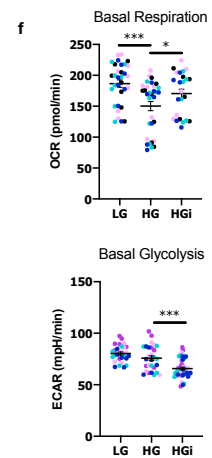

**Supplementary Figure 2.** (a) Immunoblot images of phospho-Met and total c-Met proteins of HuH-7, SNU-449, HepG2 and SK-HEP-1 cells. (b) Dot-plot graph of metabolism pathways that were over-represented in pathway enrichment analysis of low-*MET* expressing quartile (Q1) and high-*MET* expression quartile (Q4) of TCGA HCC tissue samples. (c) Dot-plot graph of gene-disease association enrichment analysis of low-*MET* expressing quartile (Q1) and high-*MET* expression quartile (Q4) of TCGA HCC tissue samples. (d) Visualization of fold

changes of differentially expressed genes in KEGG pathway “central carbon metabolism in cancer”. (e) Immunoblot images of phospho-Met, total c-Met and Calnexin proteins of Hepa1-6 cells cultured in low-glucose (LG, 5.5 mM), high-glucose (HG, 25 mM) and high glucose together with c-Met kinase activity inhibitor SU11274 (HGi). (f) Graphs of basal OCR and ECAR levels of Hepa1-6 cells in LG, HG and HGi conditions. Graphs were generated and statistical analyses were performed with the GraphPad Prism version 8.2.1 for MacOS, GraphPad Software, San Diego, California USA, [www.graphpad.com](http://www.graphpad.com). \*  $p \leq 0.05$ , \*\*  $p \leq 0.01$ , \*\*\*  $p \leq 0.001$ , \*\*\*\*  $p \leq 0.0001$

**Supplementary Table 1.** Table represents differential expression tendency of gene of interests in RT-qPCR array, RT-qPCR experiments and bioinformatic analyses with TCGA-LIHC dataset. The effect of gene expressions on overall patient survival in TCGA-LIHC dataset is represented in the last (right) column. Glucose metabolism genes that are downregulated in both HCC cell line and upregulated in High-MET expressing group of TCGA data are marked with red fonts. Genes that are not investigated in indicated condition/dataset is presented with “hyphen (-)”. “N.S.”: not significant.

| GENE  | c-Met Activity Inhibition |               |               | TCGA-LIHC              |                          |                     |
|-------|---------------------------|---------------|---------------|------------------------|--------------------------|---------------------|
|       | RT-qPCR Array             | SNU-449       | SK-HEP-1      | Normal vs. HCC Tissues | Low-MET vs. High MET     | SURVIVAL            |
| GYS1  | Downregulated             | Downregulated | N.S.          | Upregulated            | N.S.                     | Significantly Lower |
| H6PD  | Downregulated             | Downregulated | Upregulated   | Upregulated            | Higher in High-MET group | -                   |
| HK1   | -                         | Downregulated | -             | -                      | Lower in High-MET group  | -                   |
| HK2   | Downregulated             | Downregulated | Downregulated | Upregulated            | Lower in High-MET group  | Significantly Lower |
| MDH1B | Downregulated             | Downregulated | Downregulated | Upregulated            | N.S.                     | -                   |
| PDK2  | Downregulated             | Downregulated | N.S.          | N.S.                   | Higher in High-MET group | -                   |
| PDK4  | Downregulated             | Downregulated | N.S.          | Upregulated            | Higher in High-MET group | -                   |

|               |               |               |               |             |                          |                     |
|---------------|---------------|---------------|---------------|-------------|--------------------------|---------------------|
| <b>PDPR</b>   | Downregulated | Downregulated | N.S.          | Upregulated | Higher in High-MET group | -                   |
| <b>PFKL</b>   | Downregulated | Downregulated | Downregulated | Upregulated | N.S.                     | -                   |
| <b>PGAM2</b>  | Downregulated | Downregulated | -             | Upregulated | N.S.                     | -                   |
| <b>PHKG1</b>  | Downregulated | Downregulated | N.S.          | Upregulated | N.S.                     | -                   |
| <b>PKLR</b>   | Downregulated | Downregulated | N.S.          | Upregulated | Higher in High-MET group | -                   |
| <b>PYGM</b>   | Upregulated   | Downregulated | -             | N.A.        | N.S.                     | -                   |
| <b>SLC2A1</b> | Downregulated | Downregulated | Downregulated | Upregulated | Lower in High-MET group  | Significantly Lower |
| <b>SLC2A2</b> | -             | -             | -             | -           | Higher in High-MET group | -                   |
| <b>SLC2A4</b> | -             | -             | -             | -           | N.S.                     | -                   |

### Cell Culture Media and Supplements:

RPMI 1640 Medium, no glucose, no glutamine (Biological Industries, #01-101-1A)

RPMI 1640 Medium, no glutamine (Biological Industries, #01-104-1A)

DMEM, no glucose, no glutamine (Biological Industries, #01-057-1A)

DMEM, High Glucose (Biological Industries, #01-055-1A)

DMEM, low glucose, no glutamine (Biological Industries, # 01-050-1A)

Glucose Solution (Gibco, #A2494001)

Trypsin EDTA Solution B (0.25%), EDTA (0.05%) (Biological industries, #03-052-1B)

L-Glutamine Solution (200 mM) (Biological industries, #03-020-1B)

MEM Non-Essential Amino Acids Solution (100X) (Biological industries, #01-340-1B)

Sodium Pyruvate (Biological industries, #02-042-1B)

Penicillin-Streptomycin Solution (Biological industries, #01-031-1B)

Fetal Bovine Serum, qualified, heat inactivated (Gibco, #10500064)

Corning® Matrigel® Growth Factor Reduced (GFR) Basement Membrane Matrix, Phenol Red-free, LDEV-free, 10 mL (Corning, #356231)

### Supplementary Table 2. Primer sequences used in RT-qPCR analyses.

|             |          |                          |
|-------------|----------|--------------------------|
| <i>ZEB1</i> | Forward: | GCACCTGAAGAGGACCAGAG     |
|             | Reverse: | TGCATCTGGTGTTCATTTT      |
| <i>ZEB2</i> | Forward: | CGGTGCAAGAGGCGCAAACA     |
|             | Reverse: | GGAGGACTCATGGTTGGGCA     |
| <i>HK2</i>  | Forward: | GCTGTGGTGGACAGGATACG     |
|             | Reverse: | ATTTCCGGAGCCAGGTCCTTC    |
| <i>VIM</i>  | Forward: | CCTTGACATTGAGATTGCCACCTA |
|             | Reverse: | TCATCGTGATGCTGAGAAGTTTCG |

|                           |          |                        |
|---------------------------|----------|------------------------|
| <i>PFKL</i>               | Forward: | TCCTCATCTACGAGGGCTATG  |
|                           | Reverse: | CGAGCGCTGCCAATGATAGT   |
| <i>PDPR</i>               | Forward: | ATCTCCCCCAAGAAAGTGGC   |
|                           | Reverse: | CATGAAGAACAGATGTCCGGT  |
| <i>MDH1B</i>              | Forward: | CGGGTAGAGCAGATTGTCCATA |
|                           | Reverse: | CGATCCAACAGCTCTCTCCAG  |
| <i>RPL41</i>              | Forward: | GAAACCTCTGCGCCATGA     |
|                           | Reverse: | TCTTTCTTCTTTTGCGCTTCA  |
| <i>GAPDH</i>              | Forward: | GAAGGTGAAGGCGGAGTC     |
|                           | Reverse: | GAAGATGGTGATGGGATTTT   |
| <i>PKLR</i>               | Forward: | CAACTGACCCAGGAGCTG     |
|                           | Reverse: | CTCCACGGAGCGAGATGC     |
| <i>GYS1</i>               | Forward: | ATACTGCATGGAAAGGGCGG   |
|                           | Reverse: | ACTCCTGGATTCGAGCCTTG   |
| <i>PHKG1</i>              | Forward: | ACTGAAGATCTGAGCATGACCC |
|                           | Reverse: | ATCGCCTGACCACACTGCTAA  |
| <i>PDK2</i>               | Forward: | GACATGGCTAAGCTCCTGTGT  |
|                           | Reverse: | CGCCCTCATGGCATTCTTGA   |
| <i>PDK4</i>               | Forward: | CCAAGCCACATTGGAAGCAT   |
|                           | Reverse: | CGATGTGAATTGGTTGGTCTGG |
| <i>H6PD</i>               | Forward: | TGCCTTTCCGAGACCAGAAC   |
|                           | Reverse: | GCGAATGACACCGTACTCCT   |
| <i>SLC2A1 (GLUT1)</i>     | Forward: | GCGGGTTGTGCCATACTCAT   |
|                           | Reverse: | ACCCACTTCAAAGAAGGCCA   |
| <i>CDH-2 (N-Cadherin)</i> | Forward: | ATTGGACCATCACTGGGCTTA  |
|                           | Reverse: | CACACTGGCAAACCTTCACG   |
| <i>MET</i>                | Forward: | GTCAGCCTTGTCCCTCCTTC   |
|                           | Reverse: | GTCCTGCAGTCAATGCCTCT   |

**Supplementary Table 3.** Antibodies used in IF and WB experiments

|                            |           |                                                            |
|----------------------------|-----------|------------------------------------------------------------|
| Cell Signaling             | 9272      | Akt                                                        |
| Cell Signaling             | 4060      | Phospho-Akt (Ser-473)                                      |
| Santa Cruz Biotechnologies | Sc-11397  | Calnexin                                                   |
| Cell Signaling             | 9101      | Phospho-Erk 1/2 p44/42 (MAPK)<br>(Thr202/Tyr204)           |
| Cell Signaling             | 4377      | Phospho-Erk 1/2 p44/42 (MAPK)<br>(Thr202/Tyr204)           |
| Cell Signaling             | 4696      | Erk 1/2 p44/42                                             |
| Cell Signaling             | 3127      | Met                                                        |
| Santa Cruz Biotechnologies | Sc-161    | Met                                                        |
| Cell Signaling             | 3129      | Phospho-Met (Y-1234/1235)                                  |
| Santa Cruz Biotechnology   | Sc-101033 | Egr-1                                                      |
| Invitrogen                 | A-11005   | Alexa594-conjugated goat anti-mouse<br>secondary antibody  |
| Invitrogen                 | A-11037   | Alexa594-conjugated goat anti-rabbit secondary<br>antibody |
| LI-COR Biosciences         | 926-68071 | IRDye 680RD Goat anti-Rabbit IgG Secondary<br>Antibody     |

|                    |           |                                                     |
|--------------------|-----------|-----------------------------------------------------|
| LI-COR Biosciences | 926-32210 | IRDye® 800CW Goat anti-Mouse IgG Secondary Antibody |
|--------------------|-----------|-----------------------------------------------------|

**PDF files of supplementary figures and raw membrane images of immunoblots are presented in the following pages of this document.**

# Supplementary Figure 1

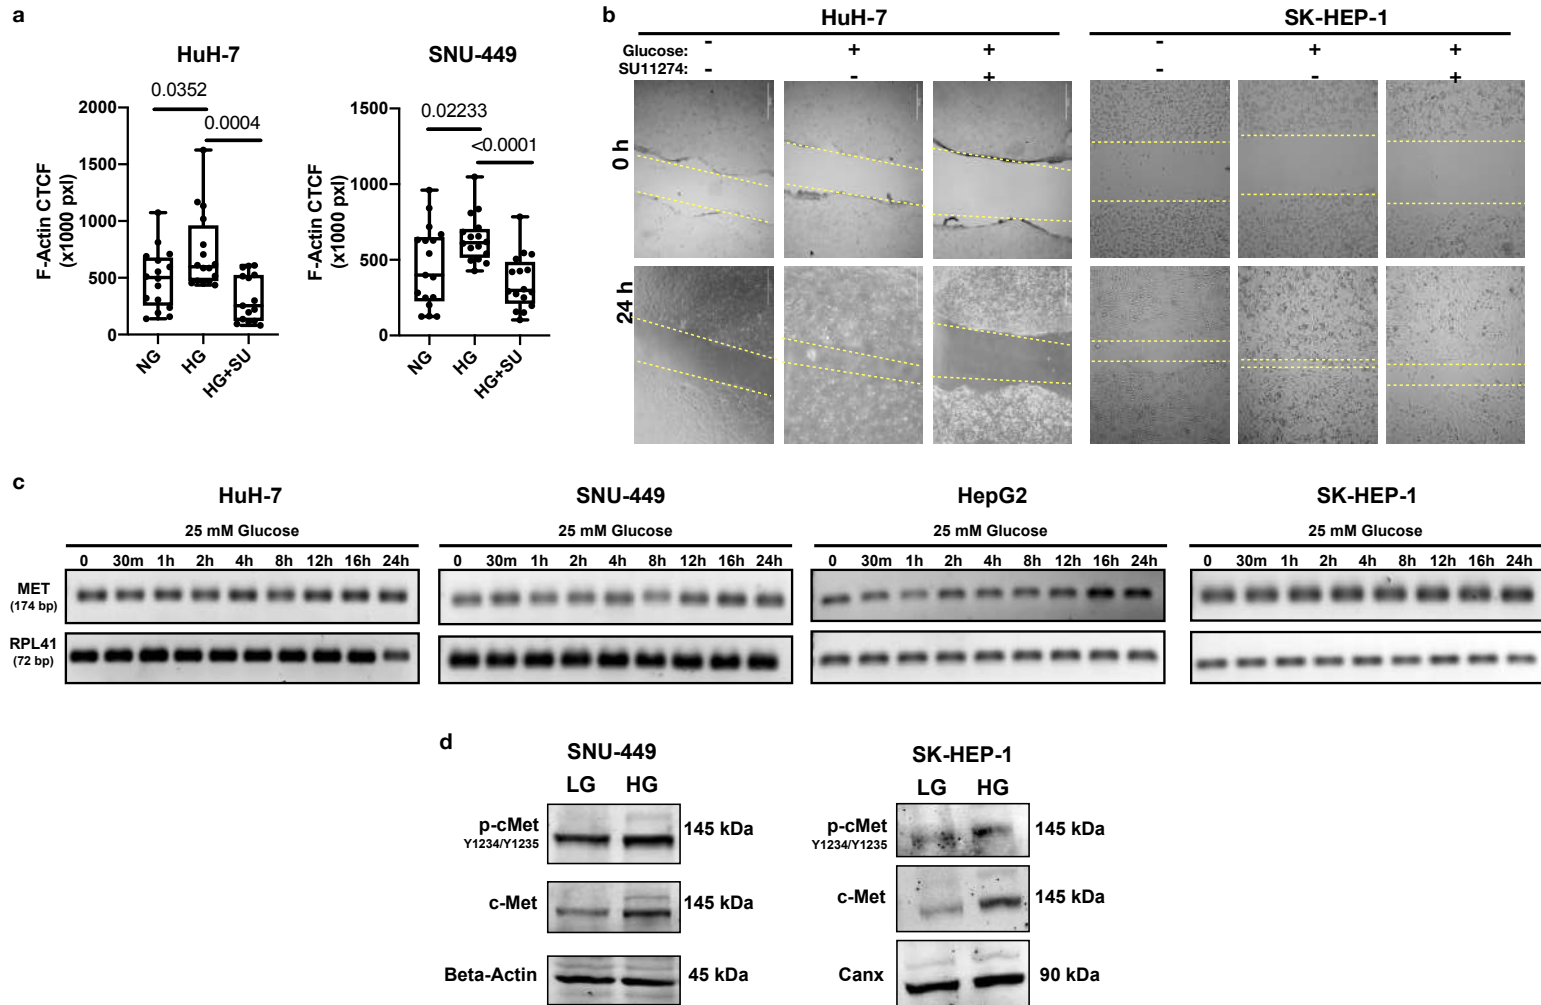



# Supplementary Figure 2

**a**

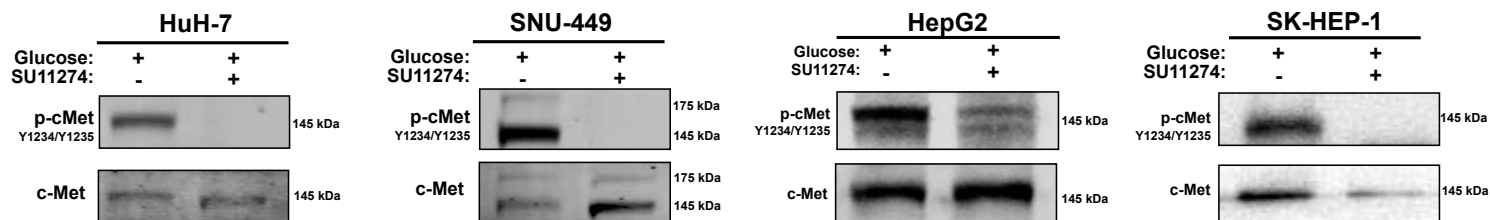

**b**

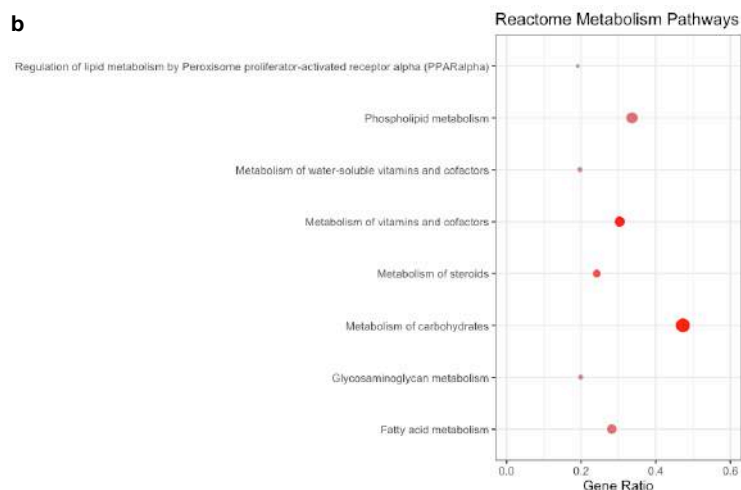

**c**

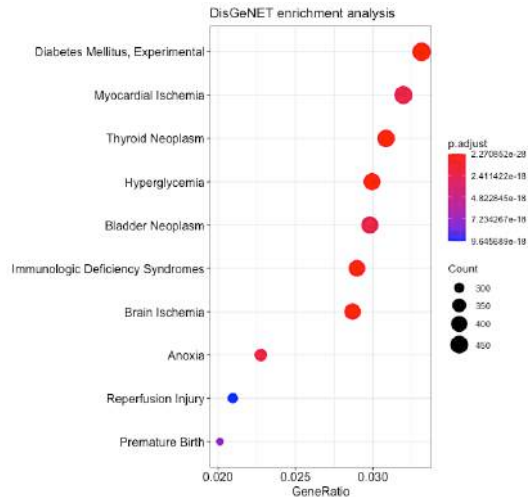

**d**

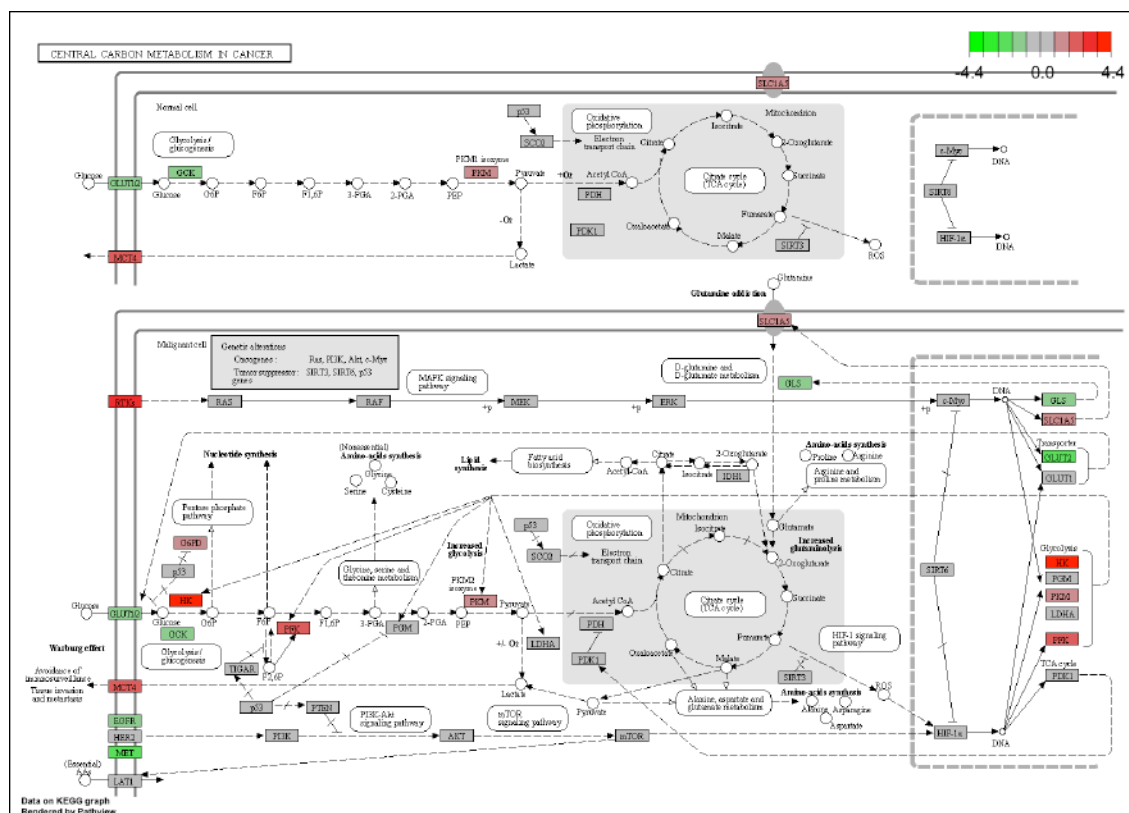

**e**

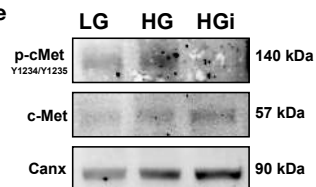

**f**

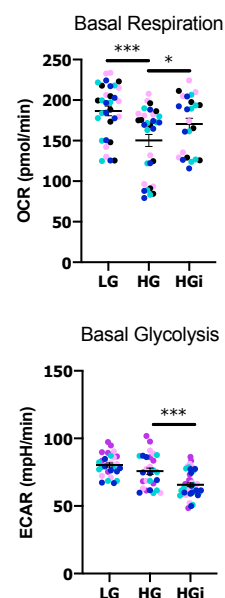

**Figure 1 c-d-e**

**HuH-7-N-Cadherin&Calnexin**

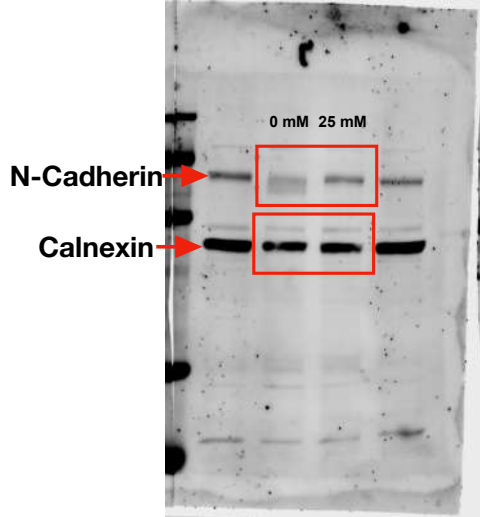

**SK-HEP-1— N-Cadherin**

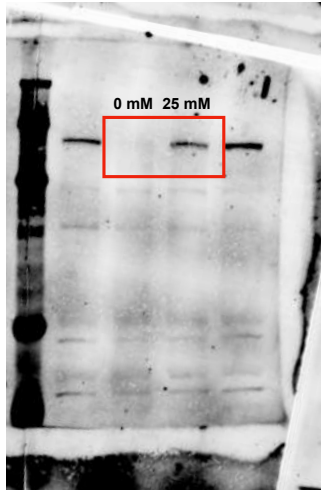

**SNU-449— N-Cadherin&Calnexin**

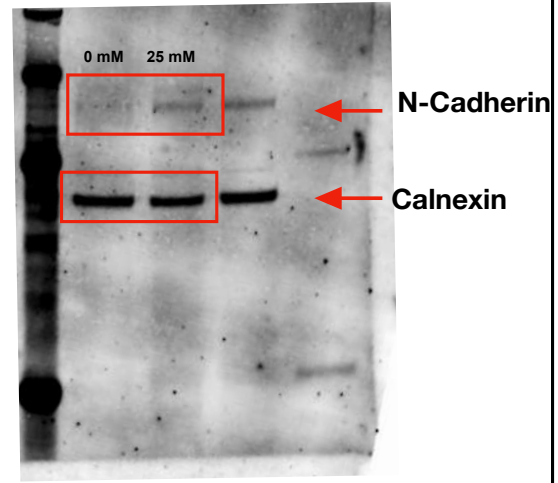

**HuH-7 - Vimentin**

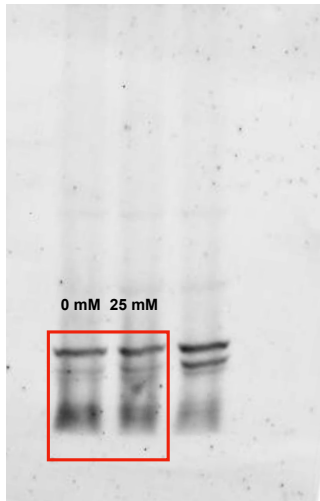

**SK-HEP-1— Calnexin**

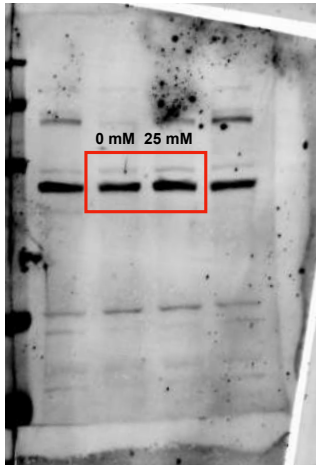

**SNU-499— Vimentin**

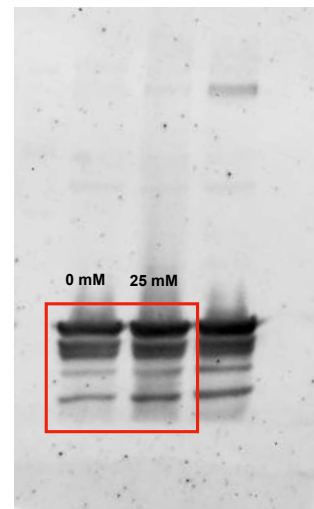

**HuH-7 - Calnexin**

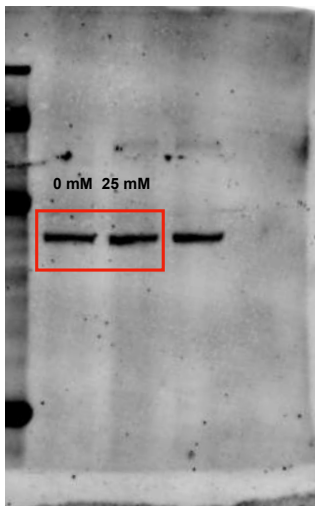

**SK-HEP-1— Vimentin**

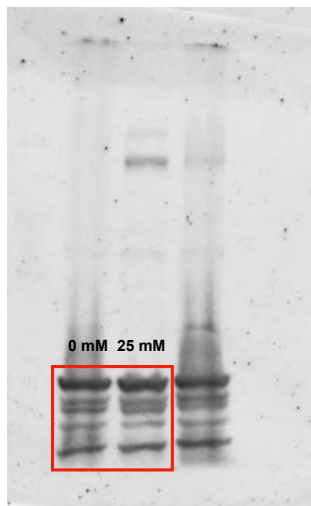

**SK-HEP-1— Calnexin**

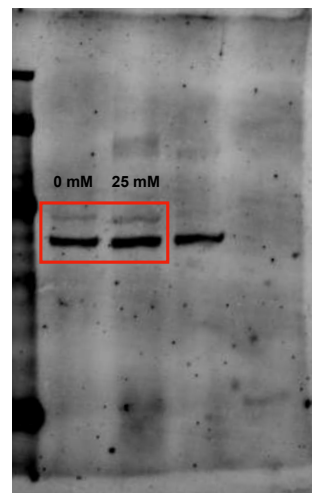

\*Membranes are cut according to the molecular marker after transfer and incubated with antibody of interest.

**Figure 3a**

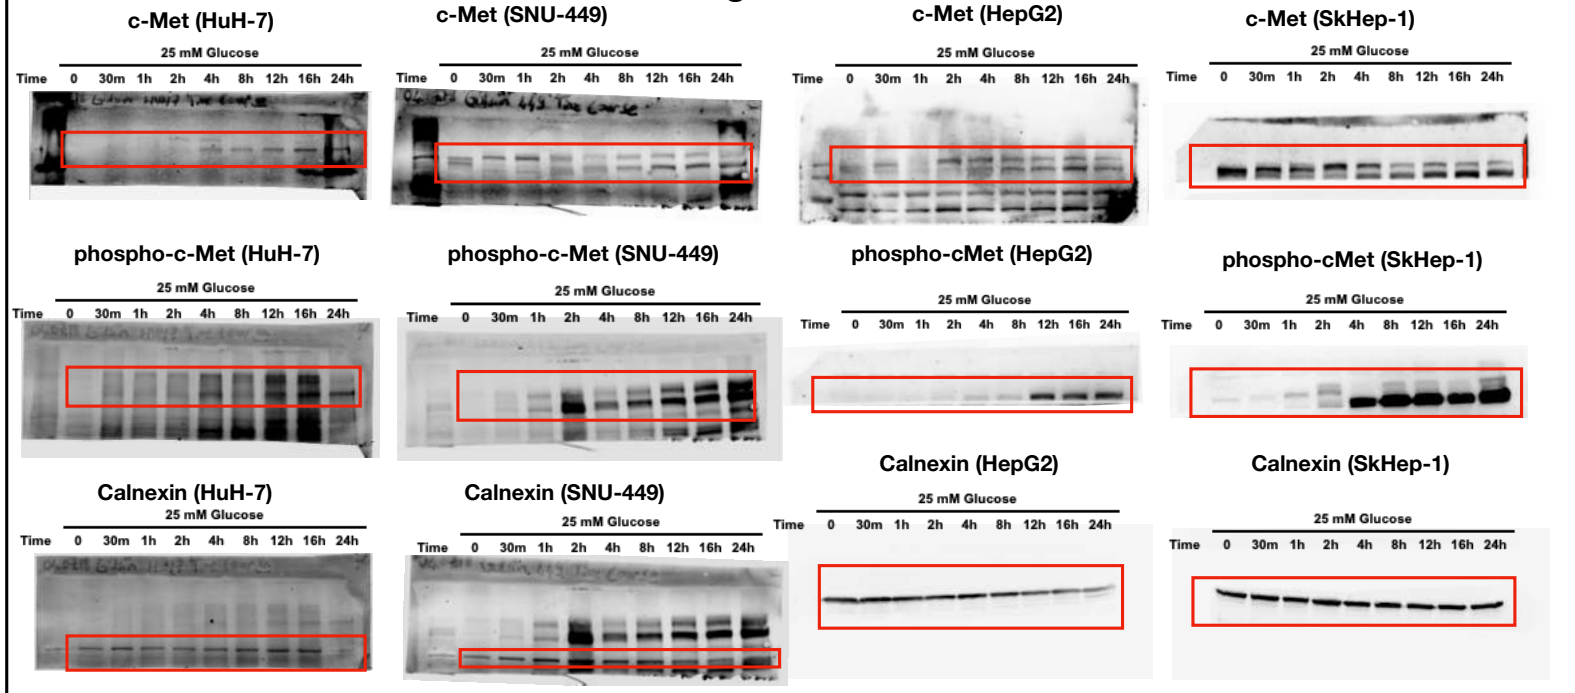

**Figure 3d**

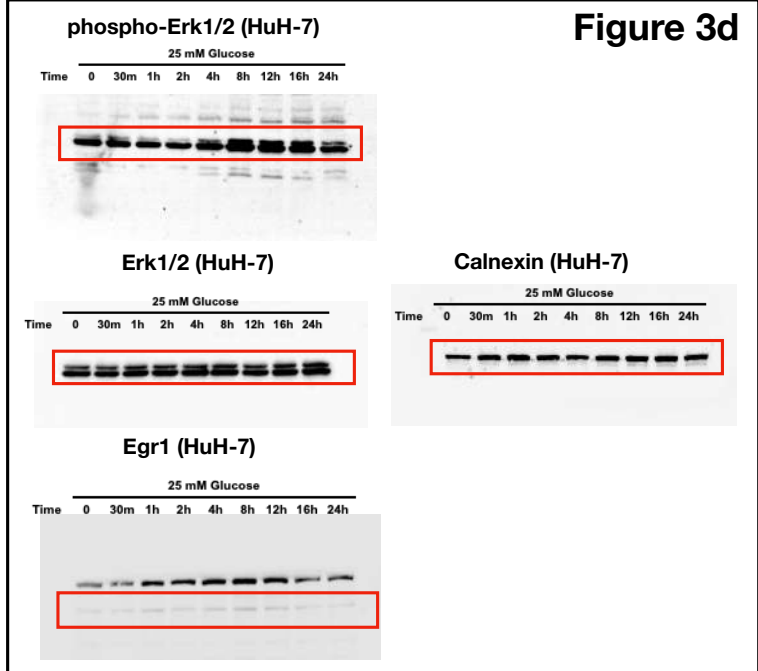

**Figure 3e**

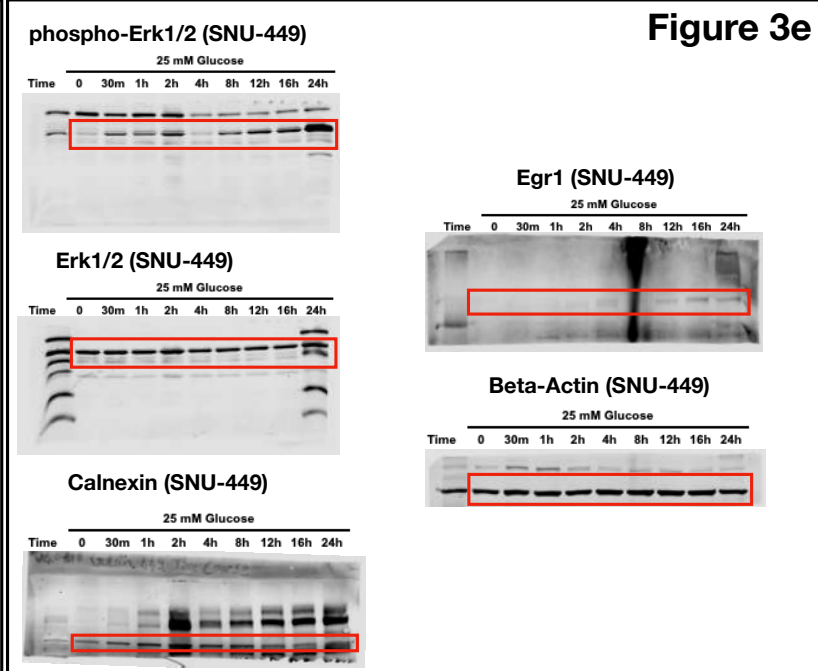

**Figure 3h-k**

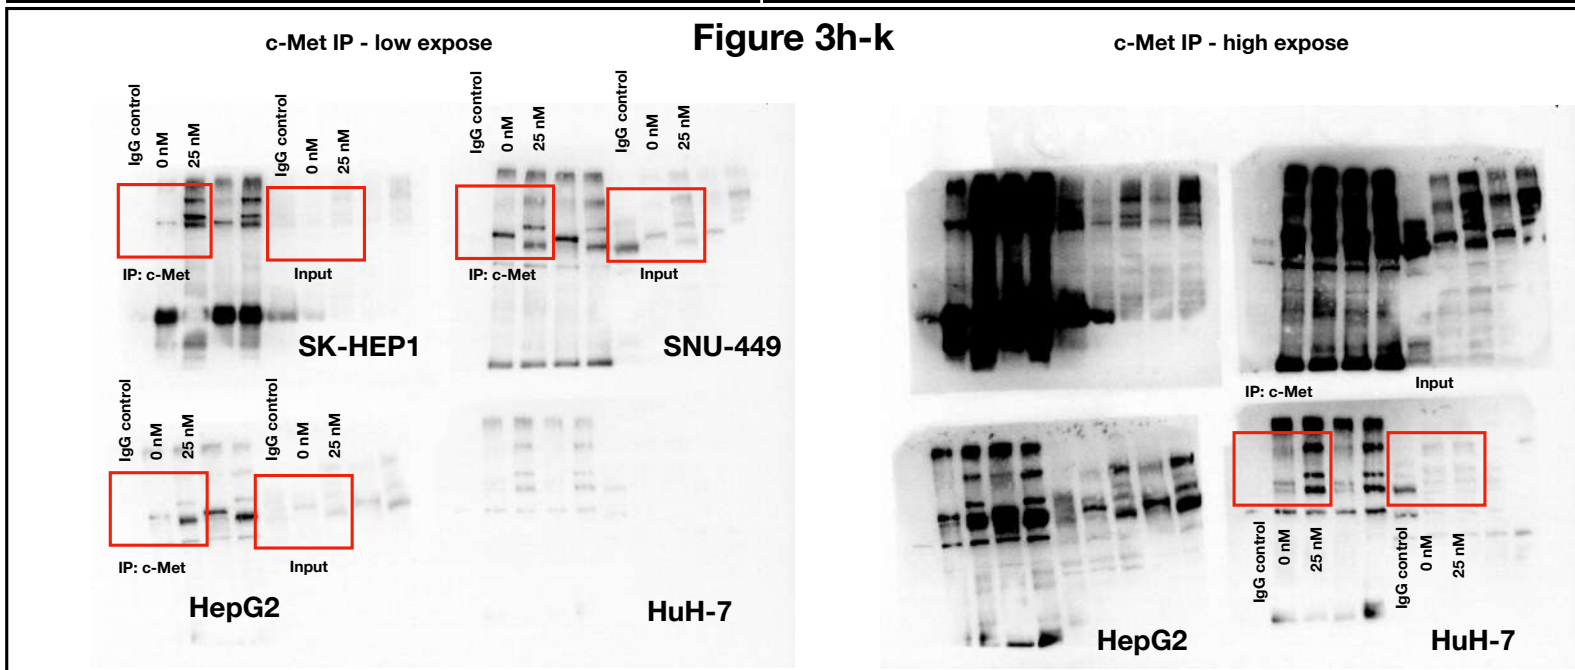

\*Membranes are cut according to the molecular marker after transfer and incubated with antibody of interest.

### Supplementary Figure 1c (agarose gel images)

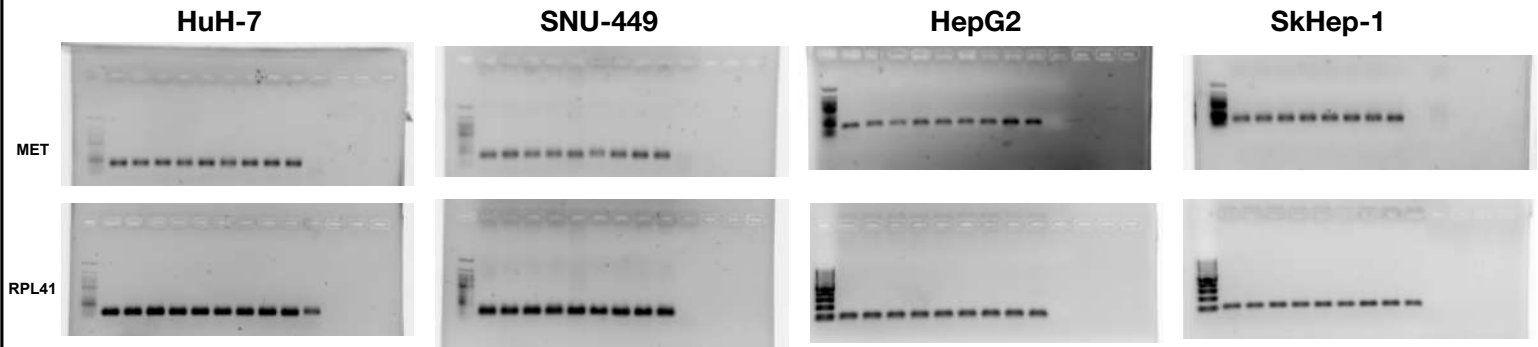

### Supplementary Figure 1d

SK-HEP-1— phospho-Met

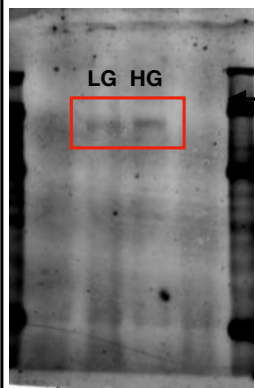

SK-HEP-1— Calnexin

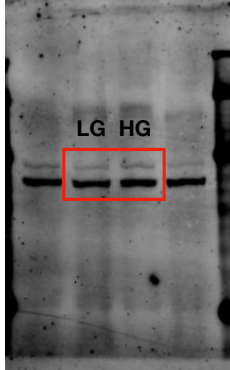

SK-HEP-1—c-Met

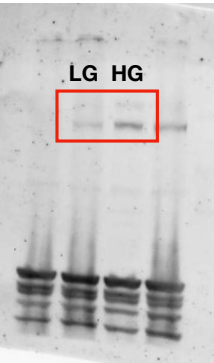

SNU-449— phospho-Met

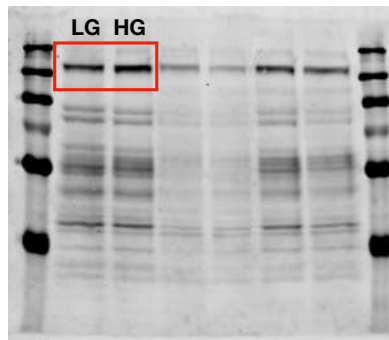

SNU-449— c-Met

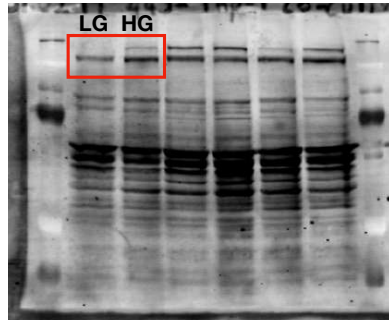

SNU-449— b-actin

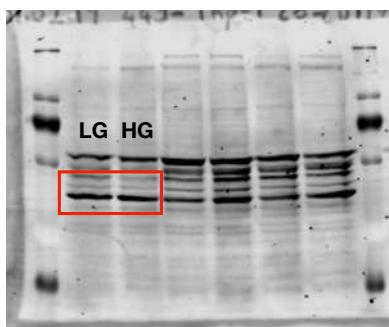

### Supplementary Figure 2a

c-Met (HuH-7)

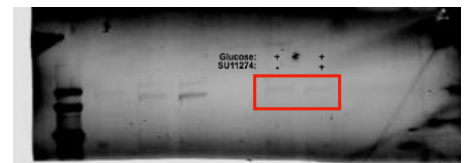

phospho-c-Met (HuH-7)

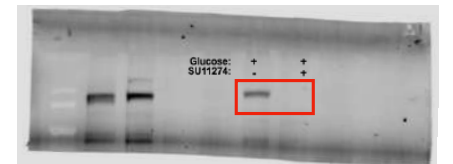

### Supplementary Figure 2a

c-Met (SNU-449)

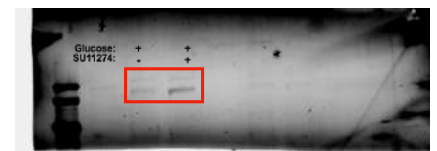

phospho-c-Met (SNU-449)

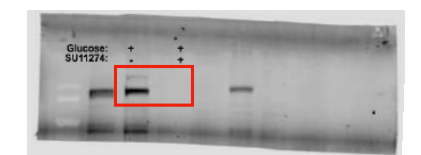

### Supplementary Figure 2a

phospho-cMet (HepG2)

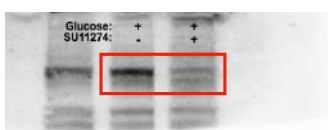

phospho-cMet (SkHep-1)

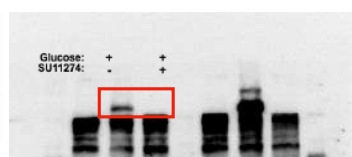

c-Met (HepG2)

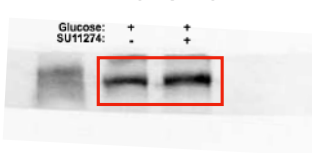

c-Met (SkHep-1)

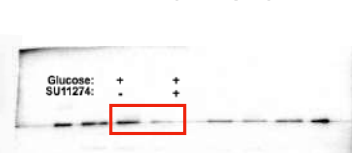

### Supplementary Figure 2e

phospho-Met (Hepa1-6)

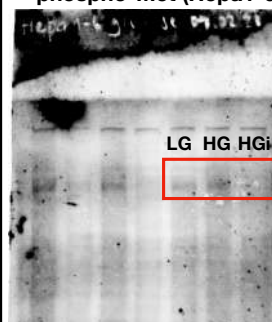

Calnexin (Hepa1-6)

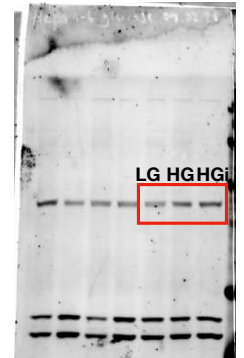

c-Met (Hepa1-6)

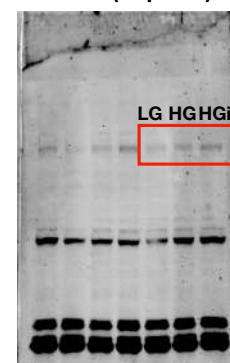

Supplement: 41598_2021_89765_MOESM1_ESM.pdf [file 41598_2021_89765_MOESM1_ESM.pdf]
